# Supplementary material for: SIV Infection Is Associated with Transient Acute-Phase Steatosis in Hepatocytes In Vivo
Source: MDPI journal article supplement (doi:10.3390/v16020296), 2024-02-15
Supplement: s1 [file s1]

Supplementary Table S1. Metabolic profiling in SIV-infected and SIV-naïve macaques.

| Treatment Group | Animal ID | Time Point | AST | ALT | Chol. |
|-----------------|-----------|------------|-----|-----|-------|
| SIV-naive       | RM110     | Wk -4      | 24  | 71  | 146   |
|                 |           | Wk 2       | 34  | 175 | 147   |
|                 |           | Wk 6       | 33  | 113 | 163   |
|                 |           | Wk 16      | 23  | 85  | 168   |
|                 |           | Nx         | 31  | 112 | 160   |
|                 | RM111     | Wk -4      | 29  | 38  | 106   |
|                 |           | Wk 2       | 26  | 32  | 124   |
|                 |           | Wk 6       | 27  | 37  | 120   |
|                 |           | Wk 16      | 39  | 30  | 127   |
|                 |           | Nx         | 43  | 33  | 124   |
|                 | RM112     | Wk -4      | 38  | 35  | 125   |
|                 |           | Wk 2       | 40  | 48  | 141   |
|                 |           | Wk 6       | 40  | 58  | 148   |
|                 |           | Wk 16      | 46  | 111 | 116   |
|                 |           | Nx         | 39  | 58  | 99    |
|                 | RM113     | Wk -4      | 34  | 29  | 110   |
|                 |           | Wk 2       | 28  | 24  | 103   |
|                 |           | Wk 6       | 35  | 34  | 101   |
|                 |           | Wk 16      | 36  | 28  | 108   |
|                 |           | Nx         | 52  | 41  | 122   |
|                 | RM114     | Wk -4      | 32  | 30  | 135   |
|                 |           | Wk 2       | 40  | 20  | 128   |
|                 |           | Wk 6       | 35  | 22  | 139   |
|                 |           | Wk 20      | 40  | 40  | 160   |
|                 |           | Nx         | 42  | 32  | 138   |
|                 | RM115     | Wk -4      | 36  | 28  | 130   |
|                 |           | Wk 2       | 47  | 29  | 109   |
|                 |           | Wk 6       | 59  | 33  | 114   |
|                 |           | Wk 20      | 39  | 25  | 121   |
|                 |           | Nx         | 40  | 27  | 153   |
|                 | RM116     | Wk -4      | 46  | 32  | 140   |
|                 |           | Wk 2       | 47  | 32  | 141   |
|                 |           | Wk 6       | 59  | 32  | 142   |
|                 |           | Wk 20      | 40  | 32  | 131   |
|                 |           | Nx         | 52  | 30  | 130   |
|                 | RM117     | Wk -4      | 34  | 27  | 145   |
|                 |           | Wk 2       | 38  | 27  | 129   |
|                 |           | Wk 6       | 49  | 32  | 150   |
|                 |           | Wk 20      | 32  | 24  | 141   |
|                 |           | Nx         | 28  | 29  | 179   |
| SIV-infected    | RM101     | Wk -4      | 39  | 34  | 122   |
|                 |           | Wk 2       | 67  | 40  | 183   |
|                 |           | Wk 6       | 55  | 52  | 164   |
|                 |           | Wk 16      | n/a | n/a | n/a   |
|                 |           | Nx         | 29  | 40  | 148   |
|                 | RM102     | Wk -4      | 62  | 47  | 92    |
|                 |           | Wk 2       | 56  | 60  | 122   |
|                 |           | Wk 6       | 33  | 35  | 109   |
|                 |           | Wk 16      | 31  | 33  | 106   |
|                 |           | Nx         | 33  | 39  | 114   |
|                 | RM103     | Wk -4      | 30  | 28  | 138   |
|                 |           | Wk 2       | 41  | 27  | 213   |
|                 |           | Wk 6       | 25  | 23  | 168   |
|                 |           | Wk 16      | 23  | 21  | 149   |
|                 |           | Nx         | 26  | 29  | 154   |
|                 | RM104     | Wk -4      | 26  | 31  | 111   |
|                 |           | Wk 2       | 91  | 104 | 137   |
|                 |           | Wk 6       | 25  | 39  | 128   |

|  |       |       |           |     |     |
|--|-------|-------|-----------|-----|-----|
|  |       | Wk 16 | n/a       | n/a | n/a |
|  |       | Nx    | n/a       | 32  | n/a |
|  | RM105 | Wk -4 | 51        | 28  | 173 |
|  |       | Wk 2  | 136       | 31  | 146 |
|  |       | Wk 6  | 48        | 18  | 136 |
|  |       | Wk 20 | 41        | 25  | 163 |
|  |       | Nx    | 135       | 18  | 111 |
|  | RM106 | Wk -4 | 29        | 31  | 100 |
|  |       | Wk 2  | 110       | 59  | 122 |
|  |       | Wk 6  | 31        | 24  | 96  |
|  |       | Wk 20 | 28        | 17  | 77  |
|  |       | Nx    | 35        | 26  | 104 |
|  | RM107 | Wk -4 | 23        | 19  | 149 |
|  |       | Wk 2  | 68        | 41  | 196 |
|  |       | Wk 6  | 23        | 19  | 172 |
|  |       | Wk 20 | 19        | 19  | 169 |
|  |       | Nx    | 37        | 16  | 152 |
|  | RM108 | Wk -4 | 24        | 17  | 149 |
|  |       | Wk 2  | 76        | 31  | 173 |
|  |       | Wk 6  | 30        | 15  | 178 |
|  |       | Wk 20 | 24        | 20  | 168 |
|  |       | Nx    | <u>41</u> | 26  | 153 |
|  | RM109 | Wk -4 | 38        | 32  | 158 |
|  |       | Wk 2  | 120       | 48  | 160 |
|  |       | Wk 6  | 59        | 22  | 130 |
|  |       | Wk 20 | n/a       | n/a | n/a |
|  |       | Nx    | n/a       | 25  | n/a |

AST – aspartate aminotransferase; ALT – alanine aminotransferase; Chol – cholesterol; n/a – not available
