# Supplementary material for: SIV Infection Is Associated with Transient Acute-Phase Steatosis in Hepatocytes In Vivo
Source: MDPI journal article supplement (doi:10.3390/v16020296), 2024-02-15
Supplement: s1 [file s1]

Supplementary Table S2. Histological findings from SIV infected and SIV naïve macaques.

| Treatment Group | Animal ID | Time Point | Findings                                                                                                                                      |
|-----------------|-----------|------------|-----------------------------------------------------------------------------------------------------------------------------------------------|
| SIV-naive       | RM110     | Wk 2       | Macrovesicular steatosis 5%                                                                                                                   |
|                 |           | Wk 6       | <b>Macrovesicular steatosis 15%</b>                                                                                                           |
|                 |           | Wk 16      | Macrovesicular steatosis 5%, <b>single focus of lobular inflammation</b>                                                                      |
|                 |           | Nx         | Macrovesicular steatosis 5%, <b>focal lobular inflammation</b>                                                                                |
|                 | RM111     | Wk 2       | Macrovesicular steatosis 5%, <b>sinusoidal dilatation</b>                                                                                     |
|                 |           | Wk 6       | <b>Macrovesicular steatosis 15%</b>                                                                                                           |
|                 |           | Wk 16      | Macrovesicular steatosis 2%                                                                                                                   |
|                 |           | Nx         | Macrovesicular steatosis 5%                                                                                                                   |
|                 | RM112     | Wk 2       | Macrovesicular steatosis 5%                                                                                                                   |
|                 |           | Wk 6       | <b>Macrovesicular steatosis 15%</b>                                                                                                           |
|                 |           | Wk 16      | Macrovesicular steatosis 5%                                                                                                                   |
|                 |           | Nx         | Macrovesicular steatosis 5%, <b>CV fibrosis, scattered portal hemosiderin-laden macrophages and iron deposits in pan-lobular distribution</b> |
|                 | RM113     | Wk 2       | Macrovesicular steatosis 2-5%                                                                                                                 |
|                 |           | Wk 6       | <b>Macrovesicular steatosis 5%, mild portal inflammation</b>                                                                                  |
|                 |           | Wk 16      | Macrovesicular steatosis 2%, <b>sinusoidal dilatation</b>                                                                                     |
|                 |           | Nx         | Macrovesicular steatosis 5%                                                                                                                   |
|                 | RM114     | Wk 2       | Macrovesicular steatosis 5%, <b>sinusoidal dilatation</b>                                                                                     |
|                 |           | Wk 6       | Macrovesicular steatosis <2%                                                                                                                  |
|                 |           | Wk 20      | Macrovesicular steatosis 2%                                                                                                                   |
|                 |           | Nx         | Macrovesicular steatosis <5%, <b>focal minimal portal and focal moderate central venulitis</b>                                                |
|                 | RM115     | Wk 2       | <b>Macrovesicular steatosis 20%</b>                                                                                                           |
|                 |           | Wk 6       | <b>Macrovesicular steatosis 15%</b>                                                                                                           |
|                 |           | Wk 20      | <b>Macrovesicular steatosis 10%</b>                                                                                                           |
|                 |           | Nx         | <b>Mild sinusoidal dilatation, focal mild lobular inflammation</b>                                                                            |
|                 | RM116     | Wk 2       | <b>Macrovesicular steatosis 10%</b>                                                                                                           |
|                 |           | Wk 6       | Macrovesicular steatosis 5%                                                                                                                   |
|                 |           | Wk 20      | <b>Macrovesicular steatosis 15%, focal lobular inflammation</b>                                                                               |
|                 |           | Nx         | <b>Focal minimal portal inflammation, focal mild lobular inflammation</b>                                                                     |
|                 | RM117     | Wk 2       | Macrovesicular steatosis 5%, <b>microvesicular steatosis 5%</b>                                                                               |
|                 |           | Wk 6       | Macrovesicular steatosis <2%                                                                                                                  |
|                 |           | Wk 20      | <b>Macrovesicular steatosis 10%</b>                                                                                                           |
|                 |           | Nx         | <b>Mild sinusoidal dilatation, focal mild portal and lobular inflammation</b>                                                                 |
| SIV-infected    | RM101     | Wk 2       | <b>Microvesicular steatosis 80%, macrovesicular steatosis 10%</b>                                                                             |
|                 |           | Wk 6       | <b>Macrovesicular steatosis 10%</b>                                                                                                           |
|                 |           | Wk 16      | <b>Macrovesicular steatosis 15%</b>                                                                                                           |
|                 |           | Nx         | Macrovesicular steatosis 5%, <b>sinusoidal dilatation</b>                                                                                     |
|                 | RM102     | Wk 2       | Macrovesicular steatosis 5%                                                                                                                   |
|                 |           | Wk 6       | Macrovesicular steatosis 5%                                                                                                                   |
|                 |           | Wk 16      | Macrovesicular steatosis 2%                                                                                                                   |
|                 |           | Nx         | Macrovesicular steatosis 5%, <b>sinusoidal dilatation</b>                                                                                     |
|                 | RM103     | Wk 2       | <b>Microvesicular steatosis 2%</b>                                                                                                            |
|                 |           | Wk 6       | Macrovesicular steatosis 5%                                                                                                                   |
|                 |           | Wk 16      | Macrovesicular steatosis <1%                                                                                                                  |
|                 |           | Nx         | Macrovesicular steatosis 5%, <b>sinusoidal dilatation, moderate portal inflammation, portal expansion</b>                                     |
|                 | RM104     | Wk 2       | Macrovesicular steatosis 5%, <b>microvesicular steatosis 80%</b>                                                                              |
|                 |           | Wk 6       | <b>Macrovesicular steatosis 10%</b>                                                                                                           |
|                 |           | Wk 16      | Macrovesicular steatosis 2%                                                                                                                   |
|                 |           | Nx         | Macrovesicular steatosis 5%, microvesicular steatosis <5%, <b>mild sinusoidal dilatation</b>                                                  |
|                 | RM105     | Wk 2       | Macrovesicular steatosis 2%, <b>microvesicular steatosis 40%</b>                                                                              |
|                 |           | Wk 6       | Macrovesicular steatosis 10%, <b>focal mild portal inflammation</b>                                                                           |
|                 |           | Wk 20      | Macrovesicular steatosis 5%                                                                                                                   |
|                 |           | Nx         | <b>Mild to moderate portal inflammation and venulitis</b>                                                                                     |
|                 | RM106     | Wk 2       | Macrovesicular steatosis 5%, <b>microvesicular steatosis 60%, scattered apoptotic hepatocytes</b>                                             |

|  |       |         |                                                                                           |
|--|-------|---------|-------------------------------------------------------------------------------------------|
|  |       | Wk 6    | Macrovesicular steatosis <2%, <b>mild portal inflammation</b>                             |
|  |       | Wk 20   | Macrovesicular steatosis 5%, <b>lobular inflammation, scattered apoptotic hepatocytes</b> |
|  |       | Nx      | Macrovesicular steatosis 5%, <b>focal mild lobular inflammation</b>                       |
|  | RM107 | Wk 2    | Macrovesicular steatosis 2%, <b>microvesicular steatosis 30%</b>                          |
|  |       | Wk 6    | Macrovesicular steatosis 5%                                                               |
|  |       | Wk 20   | Macrovesicular steatosis 5%                                                               |
|  |       | Nx      | <b>Mild to moderate sinusoidal dilatation, mild portal and central venulitis</b>          |
|  | RM108 | Wk 2    | Macrovesicular steatosis 2%, <b>microvesicular steatosis 70%</b>                          |
|  |       | Wk 6    | Macrovesicular steatosis <2%                                                              |
|  |       | Wk 20   | Macrovesicular steatosis 2%                                                               |
|  |       | Nx      | <b>Moderate sinusoidal dilatation, mild portal inflammation</b>                           |
|  | RM109 | Wk 2    | Macrovesicular steatosis <2%                                                              |
|  |       | Wk 6    | Macrovesicular steatosis <2%, <b>single focus of lobular inflammation</b>                 |
|  |       | Nx Wk 9 | <b>Mild sinusoidal dilatation, single focus of perivenular inflammation</b>               |
